# Supplementary material
Source: PubMed Central journal article supplement (PMC10198248)

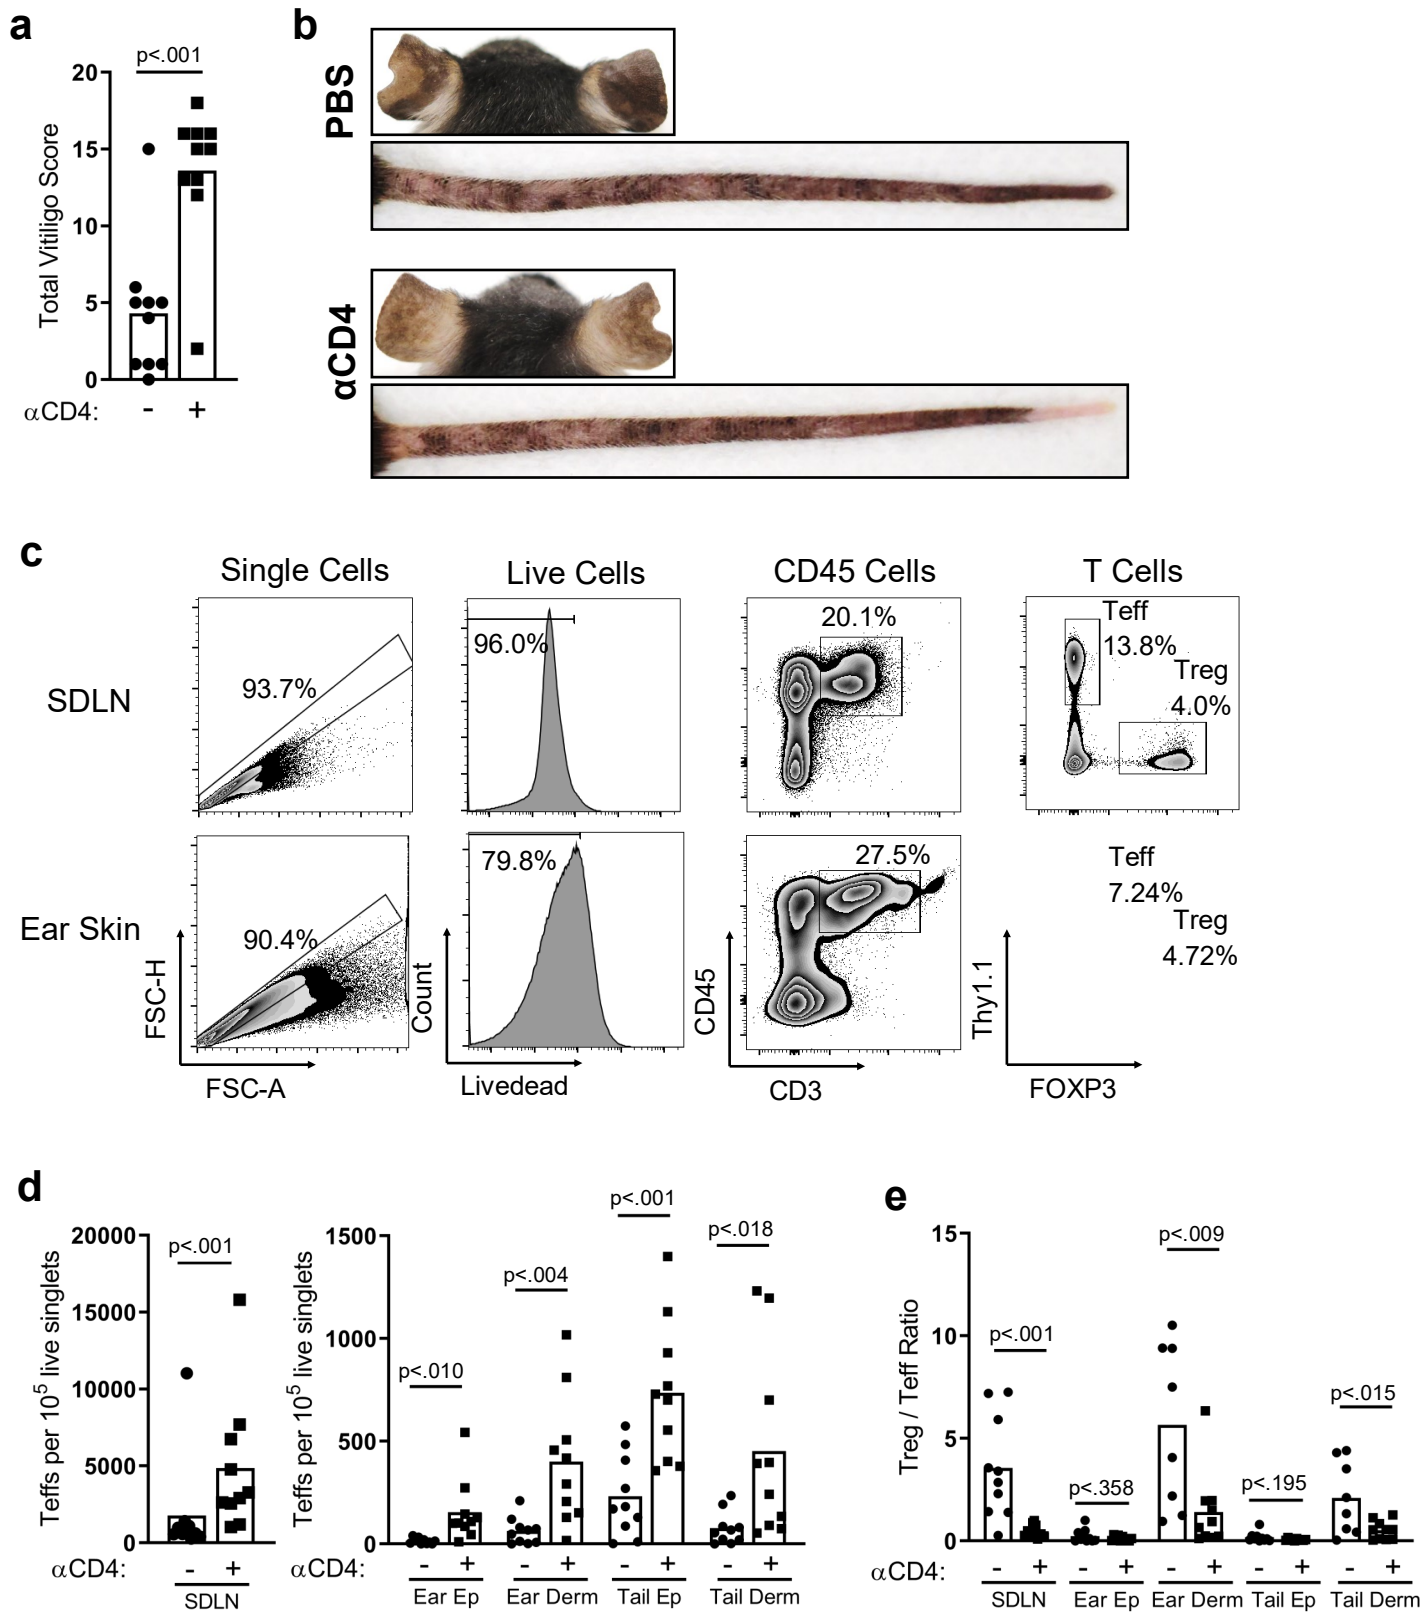

Figure S1

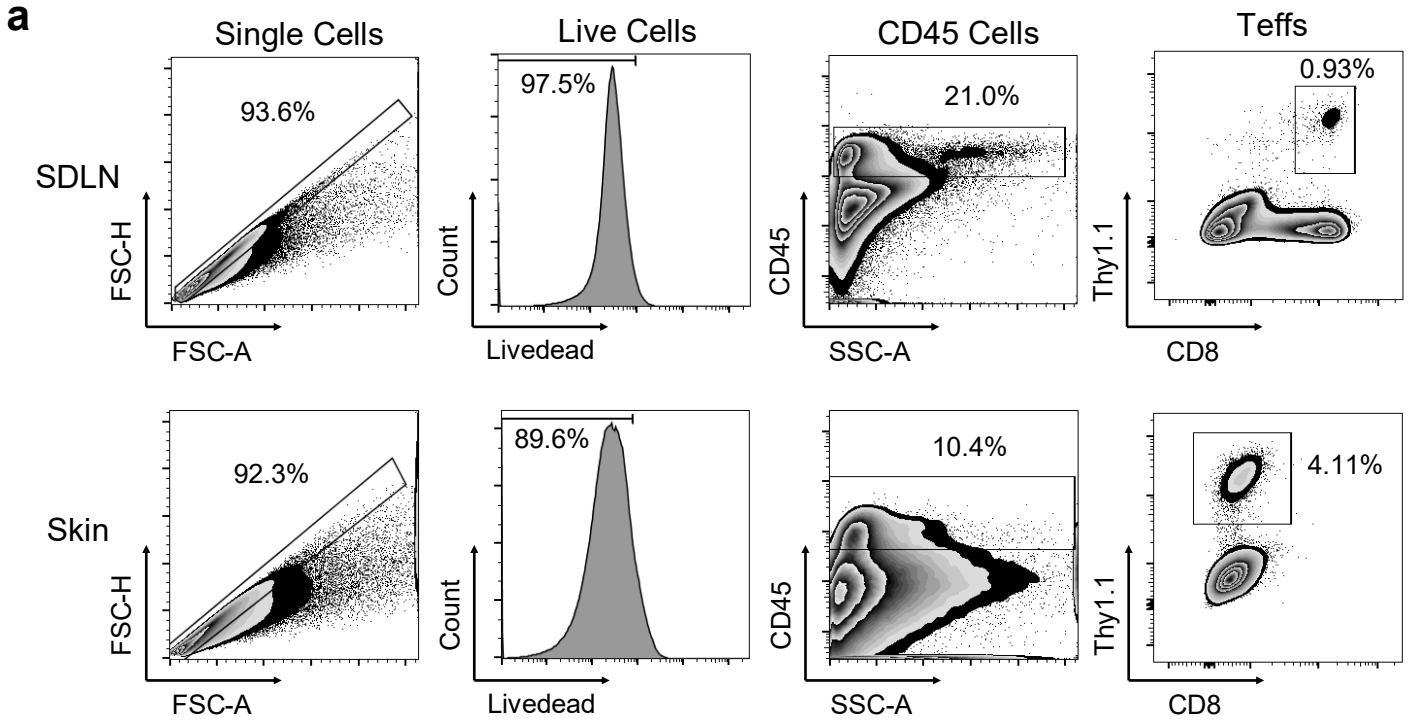

**Figure S2**

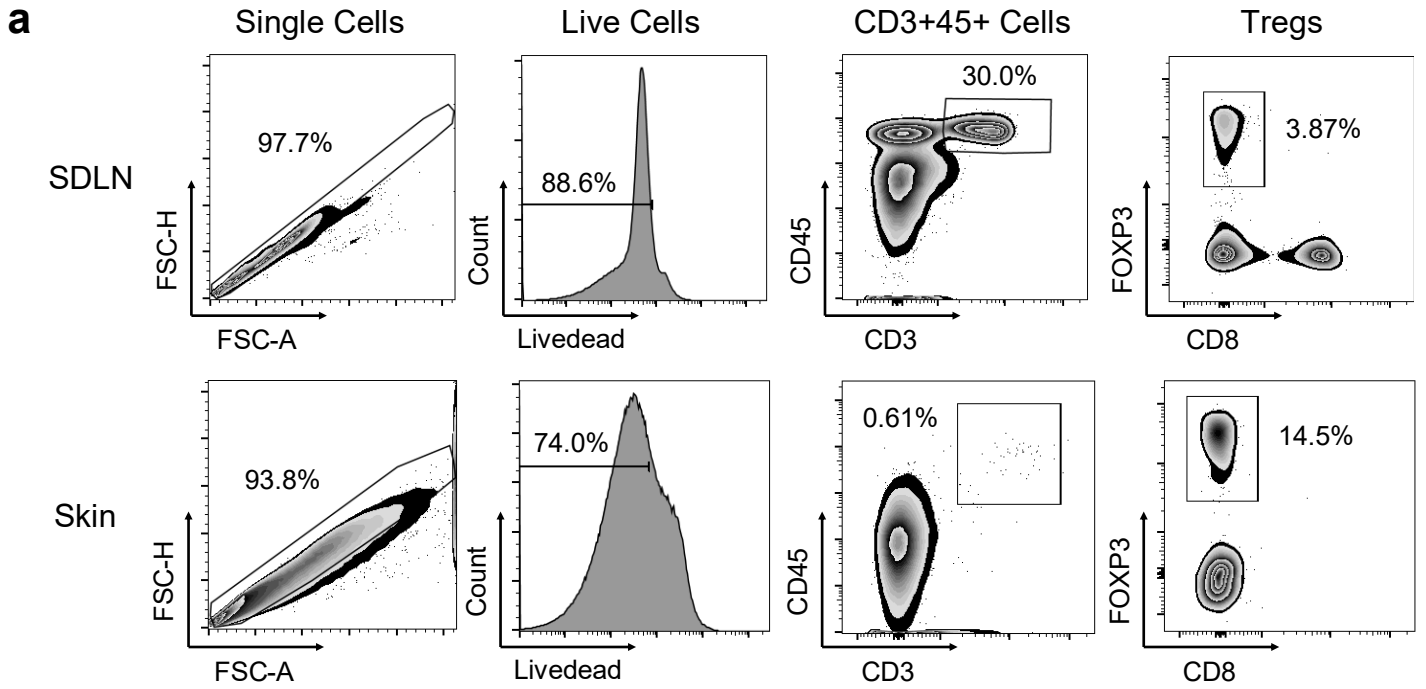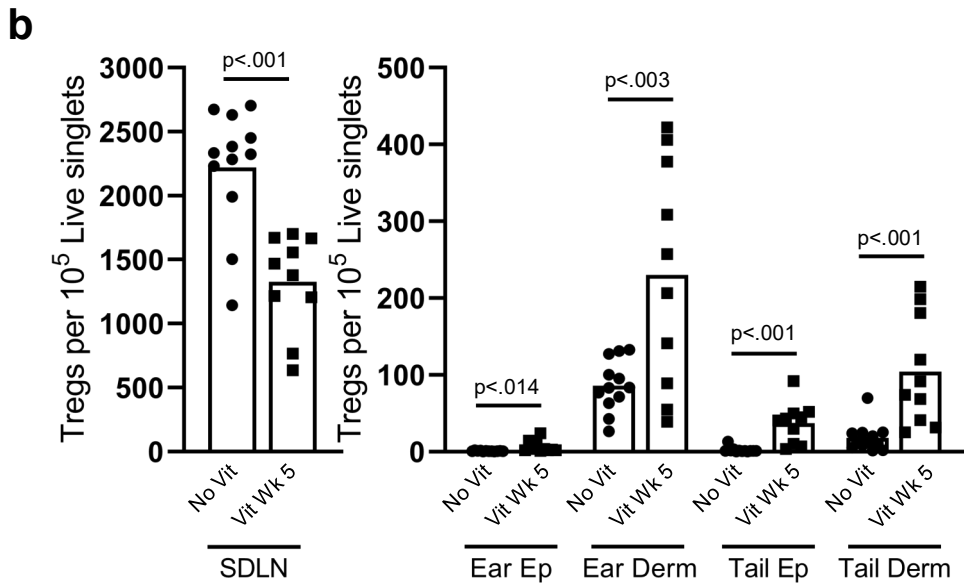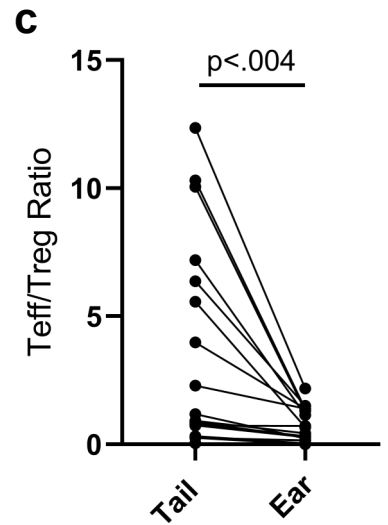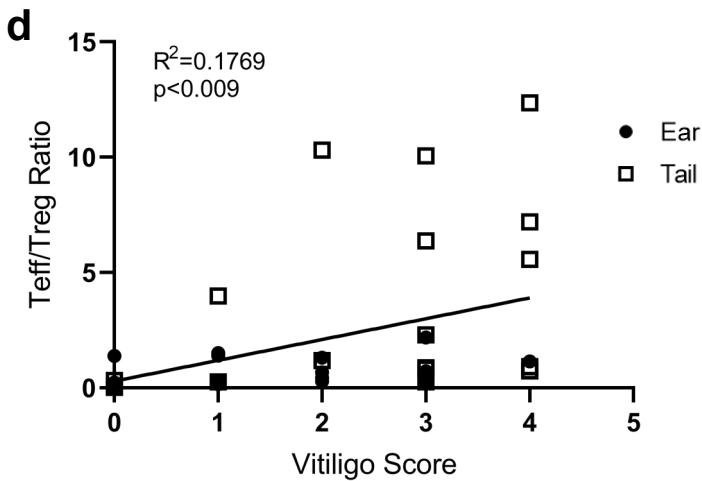

Figure S3

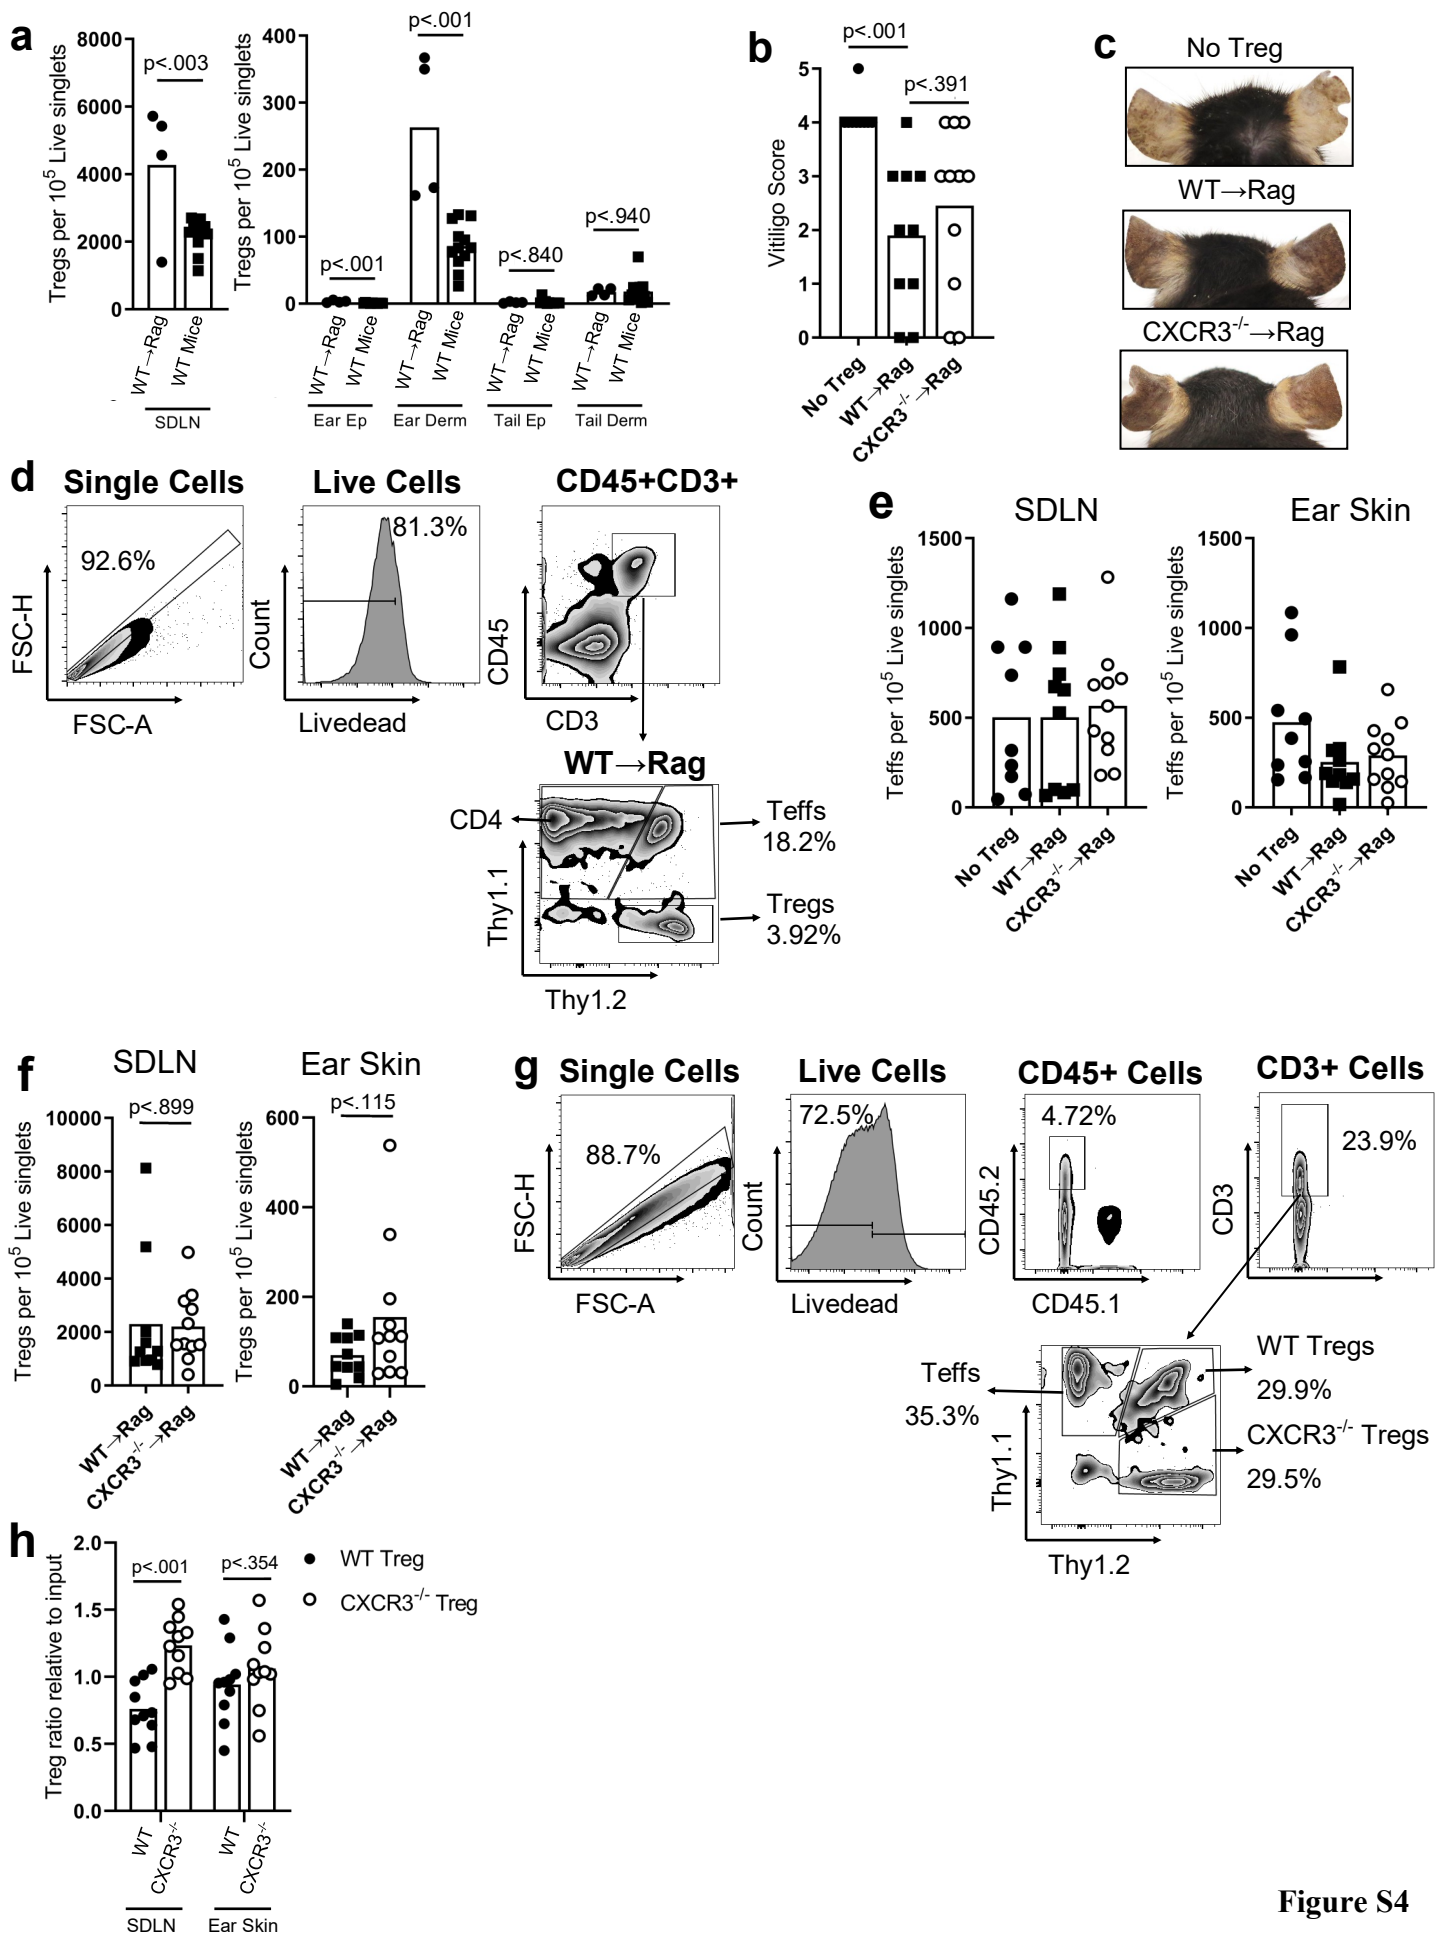

Figure S4

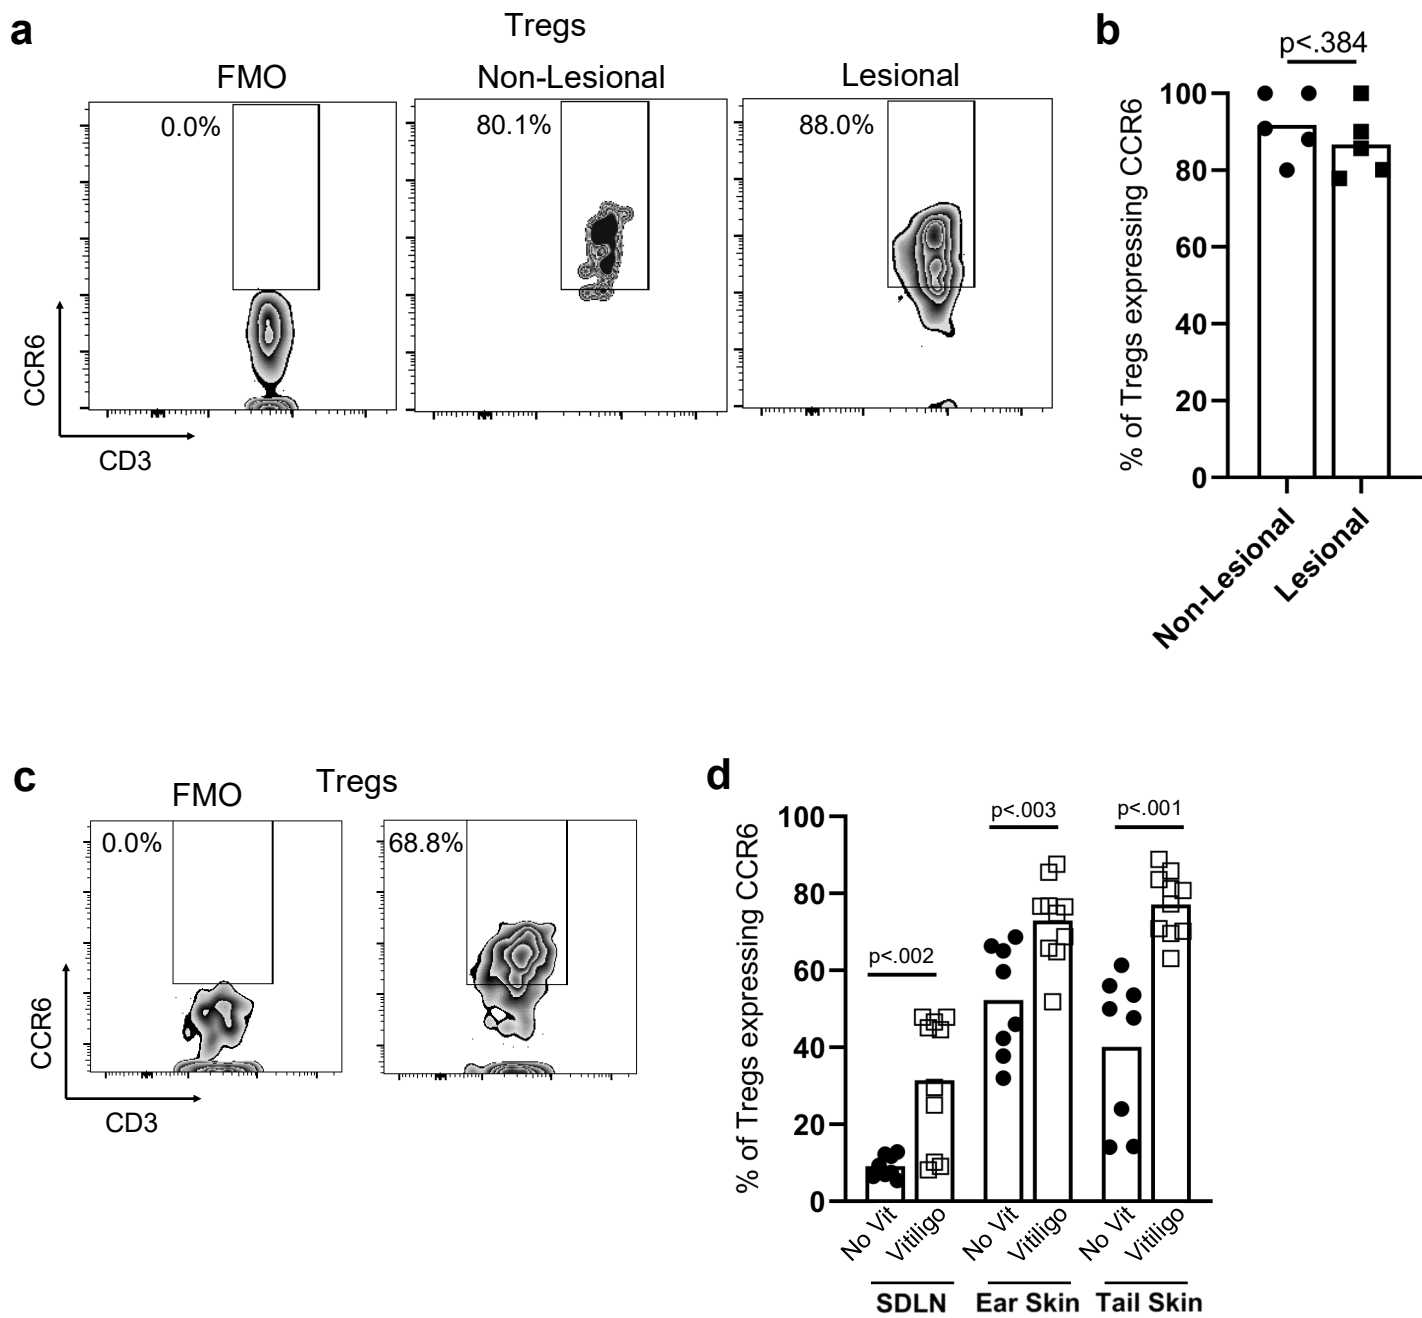

Figure S5

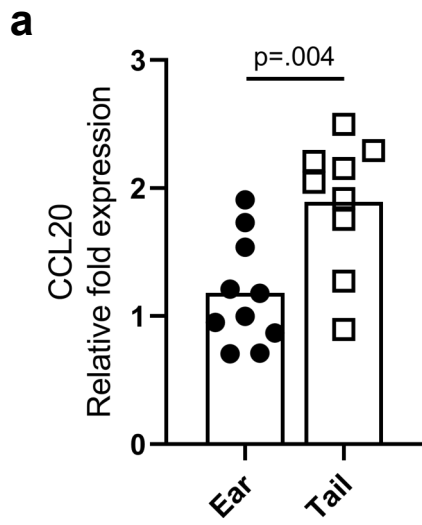

**Figure S6**

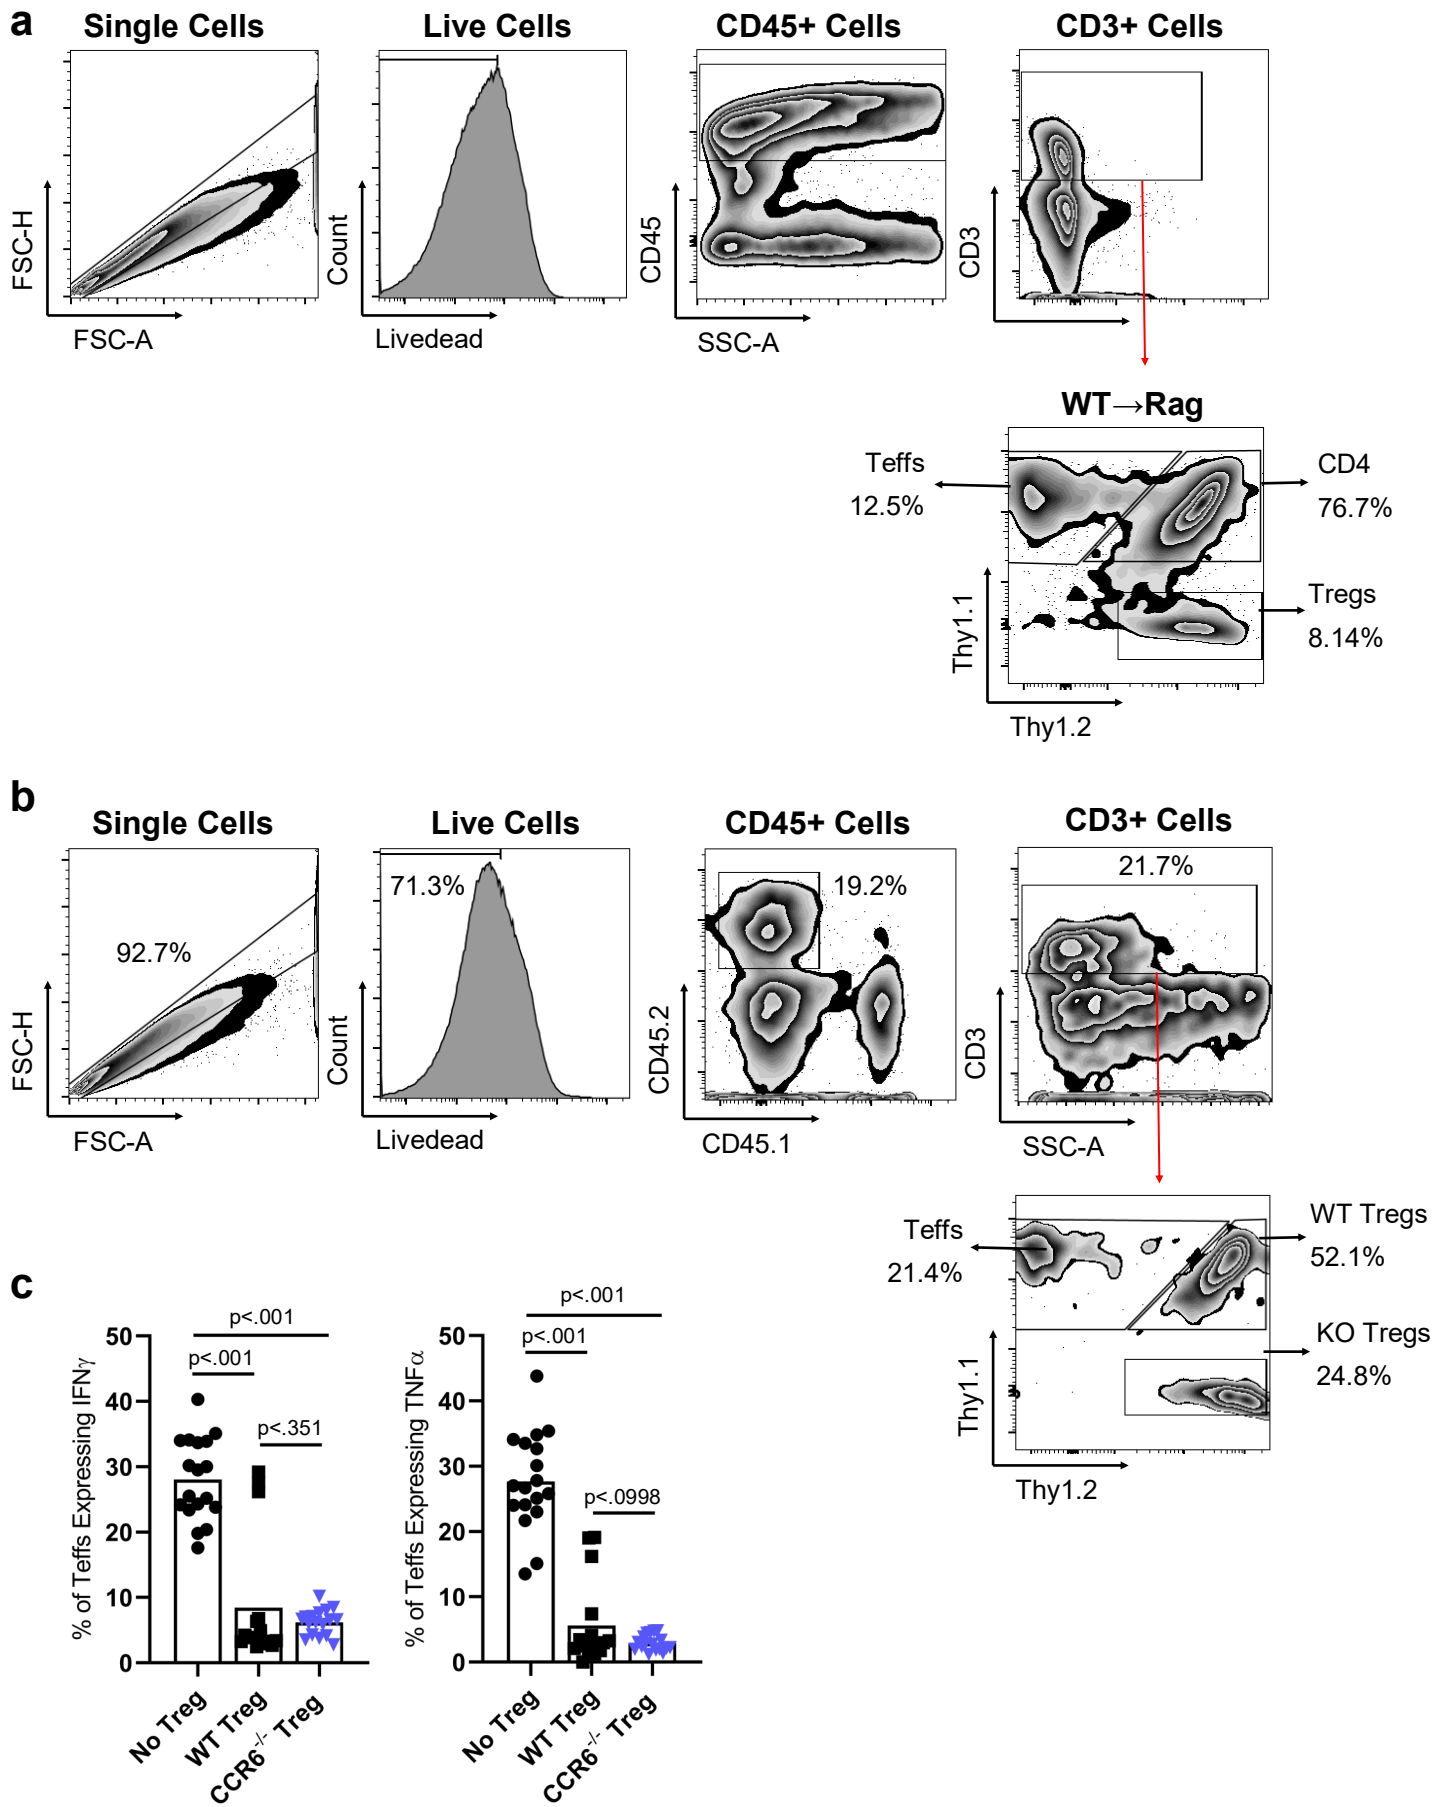

Figure S7

Supplement: NIHMS1896116-supplement-Supplementary_Material.pdf [file NIHMS1896116-supplement-Supplementary_Material.pdf]
